# Supplementary material for: Immunotherapy and biomarkers in patients with lung cancer with tuberculosis: Recent advances and future Directions
Source: PubMed Central journal article supplement — iScience. 2023 Sep 12;26(10):107881. doi: 10.1016/j.isci.2023.107881 (PMC10570004; doi:10.1016/j.isci.2023.107881), 2023-09-12
Supplement: mmc1.pdf [file mmc1.pdf]

**iScience, Volume 26**

**Supplemental information**

**Immunotherapy and biomarkers in patients  
with lung cancer with tuberculosis: Recent  
advances and future Directions**

**Ling Yang, Li Zhuang, Zhaoyang Ye, Linsheng Li, Jingzhi Guan, and Wenping Gong**

# STAR Methods

## Key Resources Table

| Reagent or resource     | Source                                    | Identifier                                                                                                                      |                                                                                 |
|-------------------------|-------------------------------------------|---------------------------------------------------------------------------------------------------------------------------------|---------------------------------------------------------------------------------|
| Bibliographic retrieval | PubMed                                    | <a href="https://pubmed.ncbi.nlm.nih.gov/">https://pubmed.ncbi.nlm.nih.gov/</a>                                                 |                                                                                 |
|                         | Web of Science                            | <a href="https://clarivate.com.cn/solutions/web-of-science/">https://clarivate.com.cn/solutions/web-of-science/</a>             |                                                                                 |
|                         | Medline                                   | <a href="https://www.nlm.nih.gov/medline/index.html">https://www.nlm.nih.gov/medline/index.html</a>                             |                                                                                 |
|                         | Chinese National Knowledge Infrastructure | <a href="https://www.cnki.net/">https://www.cnki.net/</a>                                                                       |                                                                                 |
|                         | Software                                  | GraphPad Prism ver.10                                                                                                           | <a href="https://www.graphpad-prism.cn/">https://www.graphpad-prism.cn/</a>     |
|                         |                                           | Endnote ver.19                                                                                                                  | <a href="https://endnote.com/?language=en">https://endnote.com/?language=en</a> |
|                         | MS365 PowerPoint                          | <a href="https://www.microsoft.com/zh-cn/microsoft-365/powerpoint">https://www.microsoft.com/zh-cn/microsoft-365/powerpoint</a> |                                                                                 |
|                         | CiteSpace 6.2.R2 (64-bit) Basic           | <a href="https://www.citespace.podia.com">https://www.citespace.podia.com</a>                                                   |                                                                                 |

## Resource Availability

### Lead contact

Further information and requests for resources and reagents should be directed to and will be fulfilled by the lead contact, Dr. Wenping Gong ([gwp891015@whu.edu.cn](mailto:gwp891015@whu.edu.cn)).

### Materials availability

This study did not generate new unique reagents.

## Experimental Model and Study Participant Details

### Study design

This study is a review.

### **Patients and volunteers**

This study did not include patients and volunteers.

### **Data collection**

Data collection for this study was done independently by five individuals, LY, LZ, ZYY, SLL, and WPG, each of whom conducted the literature search and data compilation in strict accordance with the conditions established above, with disagreements resolved by consensus. The analysis and visualization of the data were done by LY and WPG.

### **Method Details**

The PubMed, Web of Science, Medline, and Chinese National Knowledge Infrastructure (CNKI) databases were utilized in this review. The search formula "(((TS=(tuberculosis)) OR (TS=(TB))) AND ((TS=(lung cancer)) OR TS=(lung tumor)))" was used to retrieve and export the full record results. Further search parameters were set to DT=("ARTICLE" OR "REVIEW") and SILOID=("WOS") AND LA=("ENGLISH"). Additionally, CiteSpace 6.2.R2 (64-bit) Basic (citespace.podia.com) was employed to perform citation-based visualization of the data derived from Web of Science.
